# Supplementary material for: Applying Cold Atmospheric Plasma to Preserve the Postharvest Qualities of Winter Jujube (Ziziphus jujuba Mill. cv. Dongzao) During Cold Storage
Source: PubMed Central journal article supplement (PMC9298523; doi:10.3389/fnut.2022.934841), 2022-07-06
Supplement: Image_1.pdf [file Image_1.pdf]

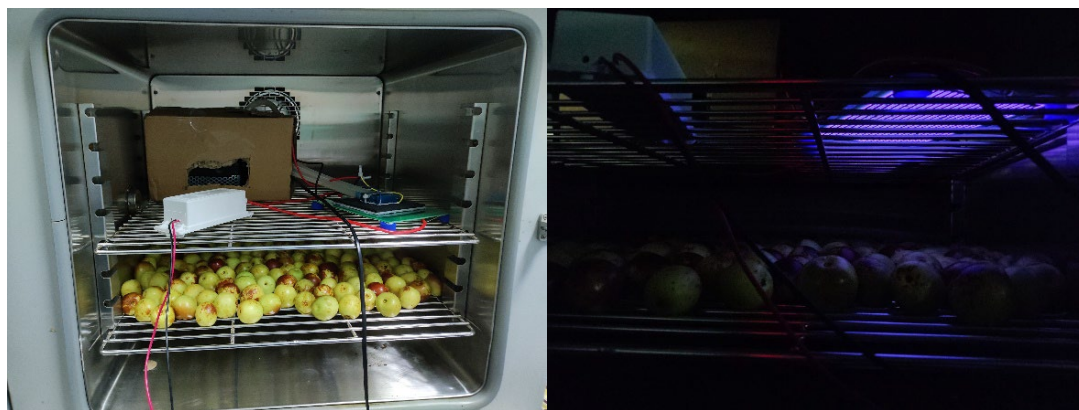

**Figure S1.** The photos of CAP treatment on jujube. Before treatment (left) and during treatment (right).
